# Supplementary material
Source: PubMed Central journal article supplement (PMC9435315)
Supplement: NIHMS1780080-supplement-3.pdf [file NIHMS1780080-supplement-3.pdf]

## Supplementary Figure S1

| Model            | <i>NRG1</i> alteration    | Tissue of origin | Patient-derived/isogenic | Cell Line/xenograft | Source             |
|------------------|---------------------------|------------------|--------------------------|---------------------|--------------------|
| MDA-MB-175-VII   | <i>PPP6R3-TENM4-NRG1</i>  | Breast           | Patient-derived          | Cell line           | ATCC               |
| MCF7-EV          | None                      | Breast           | Isogenic control         | Cell line           | MSKCC              |
| MCF7-DOC4-NRG1   | <i>DOC4-NRG1</i>          | Breast           | Isogenic                 | Cell line           | MSKCC              |
| HCC95            | <i>NRG1</i> amplification | Lung             | Patient-derived          | Cell line           | ATCC               |
| HBEC             | None                      | Lung             | Isogenic control         | Cell line           | MSKCC              |
| HBEC-CD74-NRG1   | <i>CD74-NRG1</i>          | Lung             | Isogenic                 | Cell line           | MSKCC              |
| HBEC-VAMP2-NRG1  | <i>VAMP2-NRG1</i>         | Lung             | Isogenic                 | Cell line           | MSKCC              |
| H6c7-EV          | None                      | Pancreas         | Isogenic control         | Cell line           | MSKCC              |
| H6c7-ATP1B1-NRG1 | <i>ATP1B1-NRG1</i>        | Pancreas         | Isogenic                 | Cell line           | MSKCC              |
| H6c7-SLC3A2-NRG1 | <i>SLC3A2-NRG1</i>        | Pancreas         | Isogenic                 | Cell line/xenograft | MSKCC              |
| CTG-0943         | <i>APP-NRG1</i>           | Pancreas         | Patient-derived          | Xenograft           | Champions Oncology |
| LUAD-0061AS3     | <i>SLC3A2-NRG1</i>        | Lung             | Patient-derived          | Cell line/xenograft | MSKCC              |
| OV-10-0050       | <i>CLU-NRG1</i>           | Ovarian          | Patient-derived          | Xenograft           | Wuxi AppTec        |
| ST3204           | <i>CD74-NRG1</i>          | Lung             | Patient-derived          | Xenograft           | XenoStart          |
| ST2891           | <i>CD74-NRG1</i>          | Lung             | Patient-derived          | Xenograft           | XenoStart          |

**Supplementary Figure S1. Characteristics of cell lines and PDX models used in this study.** *NRG1* fusions or empty vectors were introduced by lentiviral-mediated overexpression. Cells stably expressing the fusions were selected with antibiotics. HBEC: immortalized ( expression of TERT, CDK4, dominant negative p53 mutant) human bronchiolar epithelial cells. H6C7: immortalized (expression of viral E6 and E7 proteins) human pancreatic ductal epithelial cells. MCF7: triple-negative breast cancer cell line. EV: empty vector. ATCC: American Type Culture Collection. MSKCC: Memorial Sloan Kettering Cancer Center

## Supplementary Figure S2

**A**

| Cell Line       | IC <sub>50</sub> For Growth Inhibition (nmol/L) |
|-----------------|-------------------------------------------------|
| HBEC-CD74-NRG1  | 0.05 (0.01-0.22)                                |
| HBEC-VAMP2-NRG1 | 0.11 (0.01-2.1)                                 |
| HBEC            | 2995 (847.3-ND)                                 |
| LUAD-0061AS3    | 14.2 (2.8-105)                                  |
| HCC95           | 0.15 (0.03-1.43)                                |
| MCF7-DOC4-NRG1  | 2.01 (0.36-23.50)                               |
| MCF7-EV         | 4811 (2128-39,251)                              |
| MDA-MB-175-VII  | 0.04 (0.14-1.3)                                 |

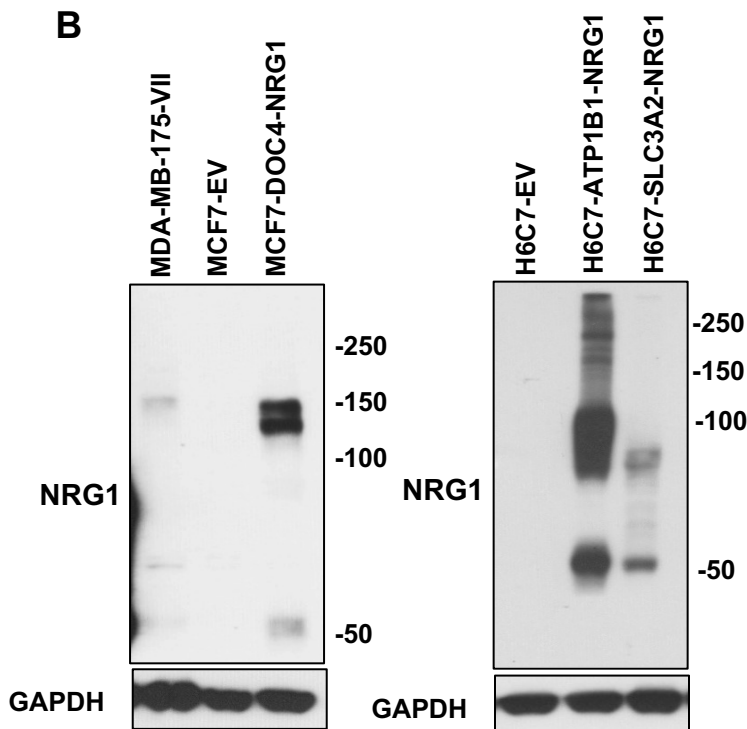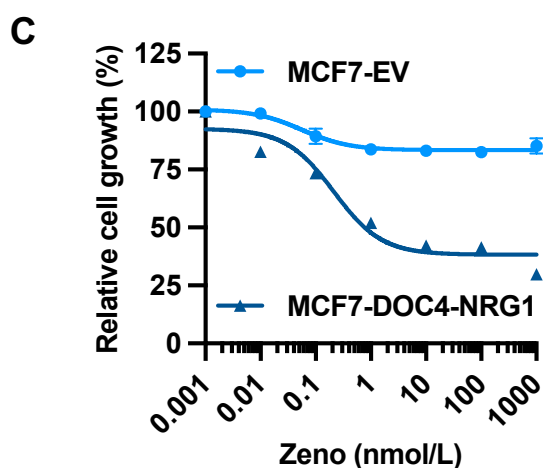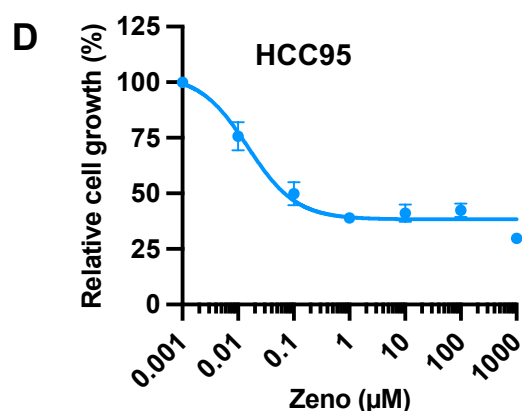

**Supplementary Figure S2. IC<sub>50</sub> values for inhibition of growth by Zeno and expression of NRG1 fusions and .** **A.** Cells were treated with Zeno for 96 hours and then growth determined using AlamarBlue viability dye. Results are expressed relative to the vehicle-treated controls (100%). Data was analyzed by non-linear regression for curve fitting and generation of IC<sub>50</sub> values. The 95% confidence interval (CI) is given in brackets. Results are from one representative experiment in which each condition was assayed in 3-4 replicates and repeated at least two times. **B.** Expression of NRG1 was examined by western blotting. The MDA-MB-175-VII cell line was used as a control for the DOC4-NRG1 fusion. **C** and **D.** Cells were treated with the indicated concentrations of Zeno for 96 h and then viability was determined. Data was analyzed by non-linear regression to determine IC<sub>50</sub> values for inhibition of growth (see A for IC<sub>50</sub> values). Results represent the mean  $\pm$  SD of three replicate determinations in one experiment. ND: Curve could not be fitted to accurately calculate an upper limit.

Supplementary Figure S3

HCC95

A

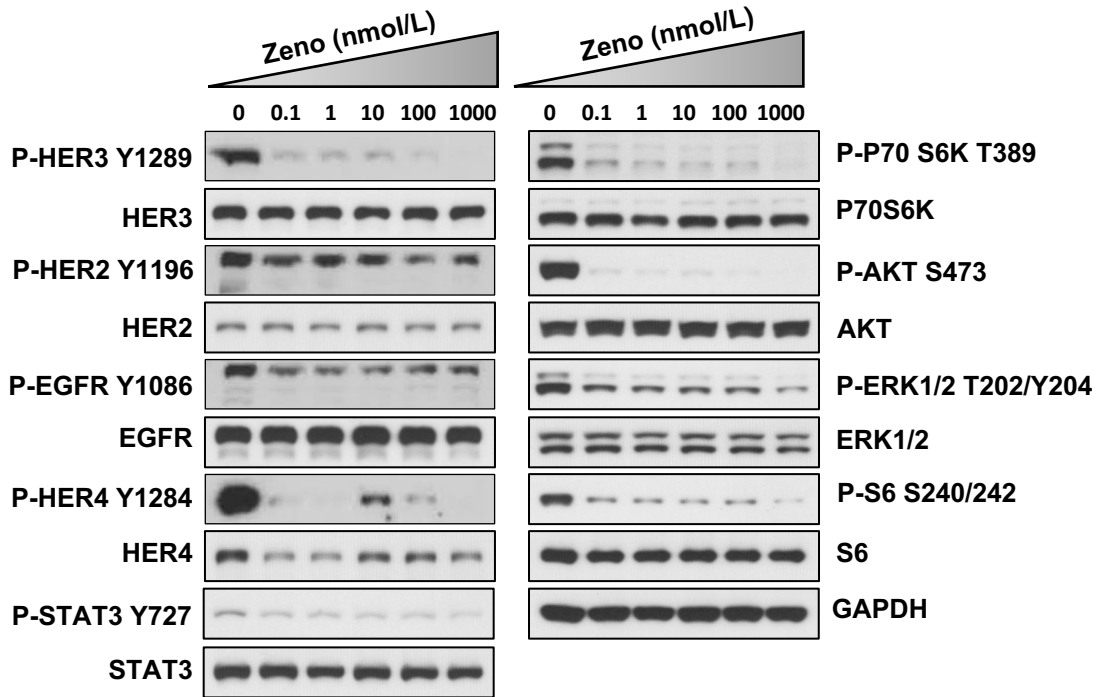

B

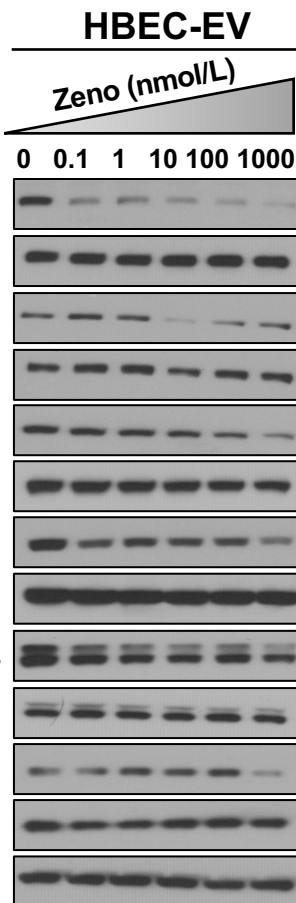

C

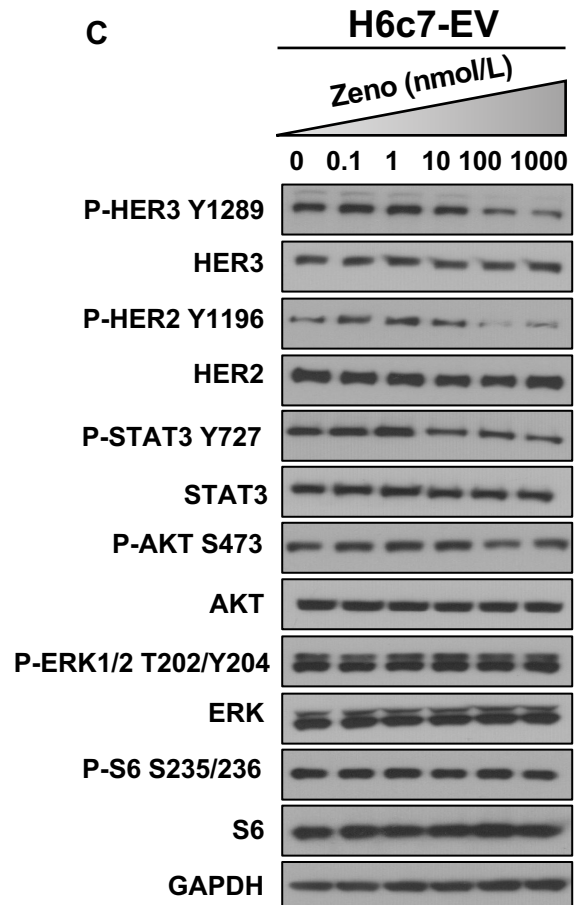

**Supplementary Figure S3. Inhibition of signaling by Zeno in HCC95, HBEC-EV and H6c7-EV cells. A-C.** Cells were deprived of serum for 24 h and then treated with Zeno for 1.5 hours. Whole-cell extracts were then immunoblotted for the phosphorylated or total proteins indicated. Western blotting was conducted in two independent experiments and representative immunoblots are shown.

## Supplementary Figure S4

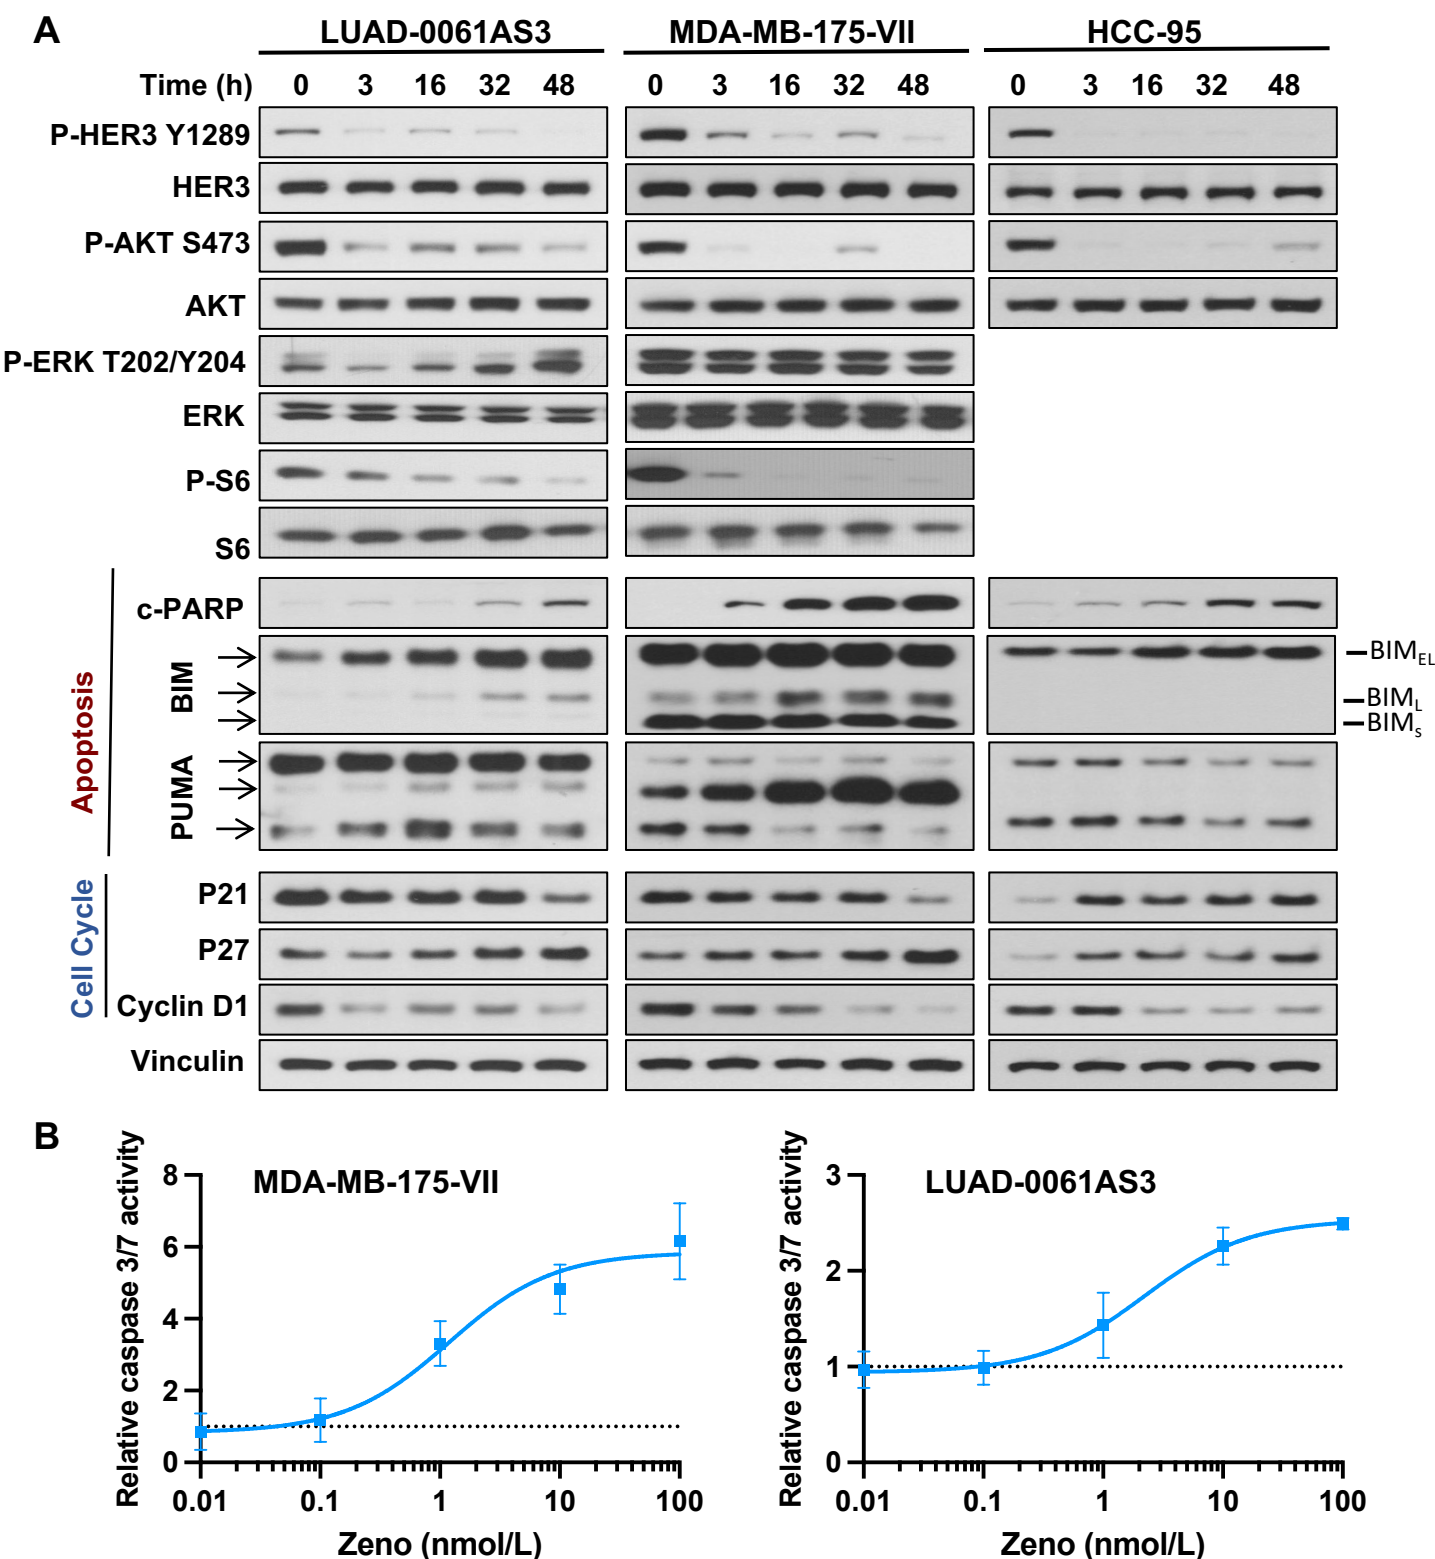

**Supplementary Figure S4. Time course of Zeno action and induction of apoptosis. A.** Cells were treated with Zeno (50 nmol/L) for up to 48 h and then cell extracts were prepared for western blotting. Representative immunoblots are shown with vinculin expression used as a western blotting loading control. At least two independent experiments were conducted. **B.** MDA-MB-175-VII (**left**) and LUAD-0061AS3 (**right**) cells were treated with the indicated concentrations of Zeno for 72 h then caspase 3/7 enzymatic activity determined in cell homogenates. Results represent the mean  $\pm$  SD of 6 replicates in one experiment. Caspase activity in DMSO (vehicle)-treated cells was arbitrarily assigned a value of 1 (dotted line) and all other data points are expressed relative to this.

## Supplementary Figure S5

**A**

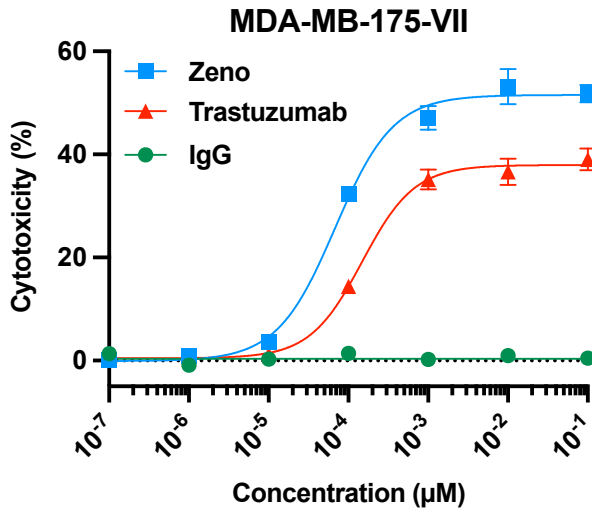

**B**

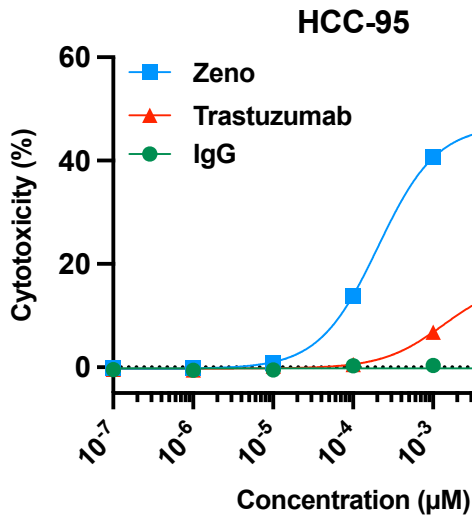

### Supplementary Figure S4. Induction of antibody-dependent cellular cytotoxicity (ADCC) by Zeno.

Chromium release assay was used to assess ADCC activity of Zeno in comparison to trastuzumab and non-specific IgG1 in MDA-MB-175-VII (A. ) and HCC-95 (B) cells. Results represent the mean  $\pm$  SD of three replicates in one experiment.

# Supplementary Figure S6

## H6c7-SLC3A2-NRG1 Xenograft

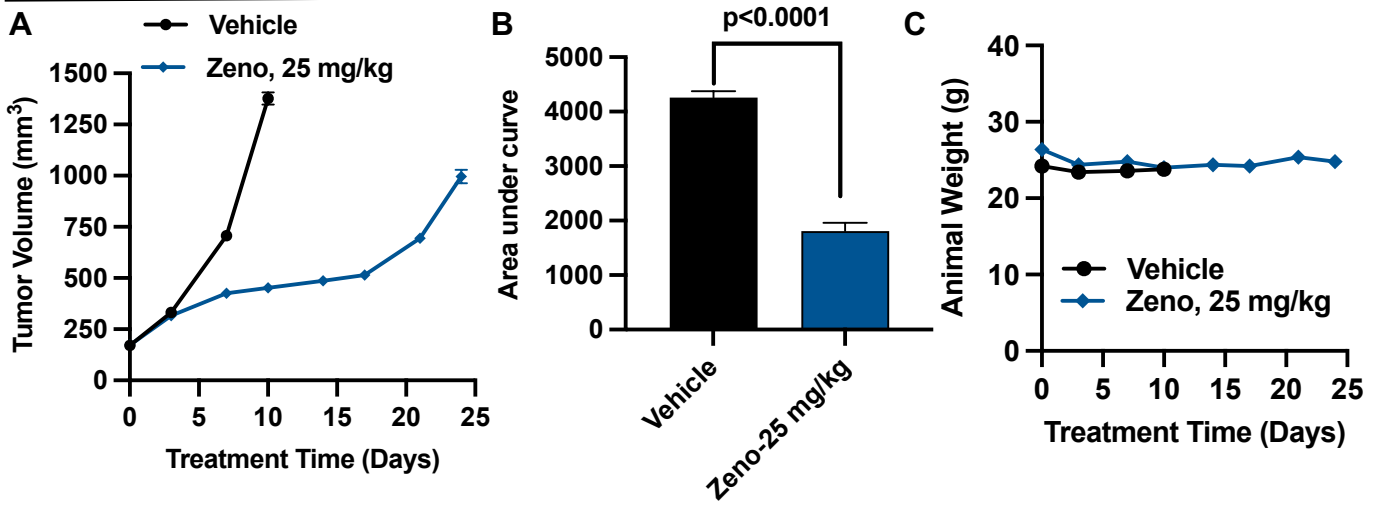

## ST2891 PDX

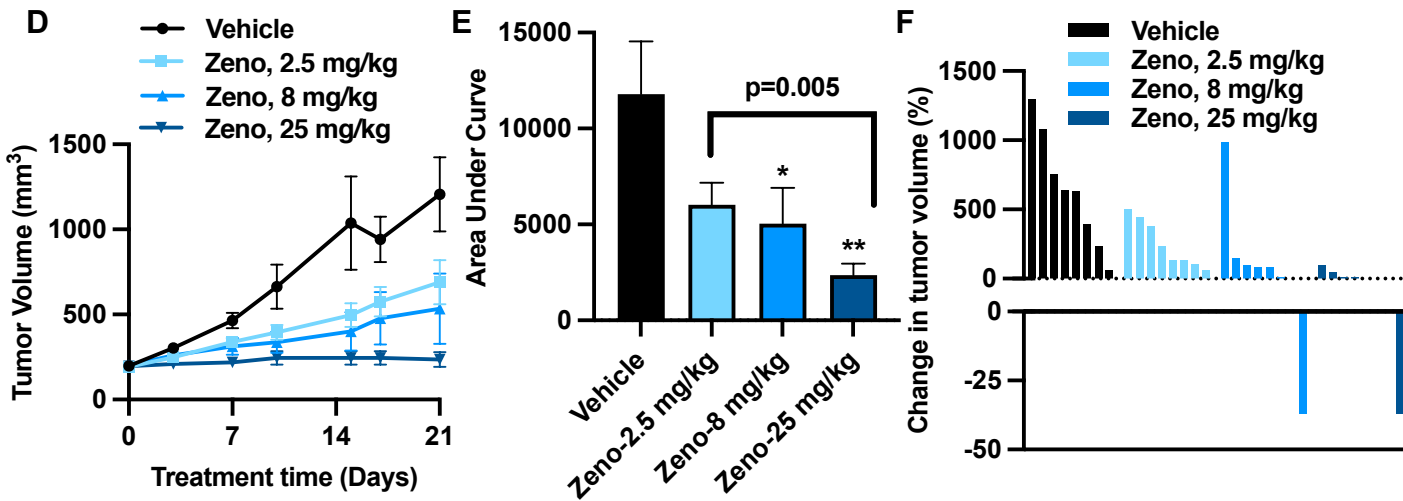

## LUAD-0061AS3 PDX

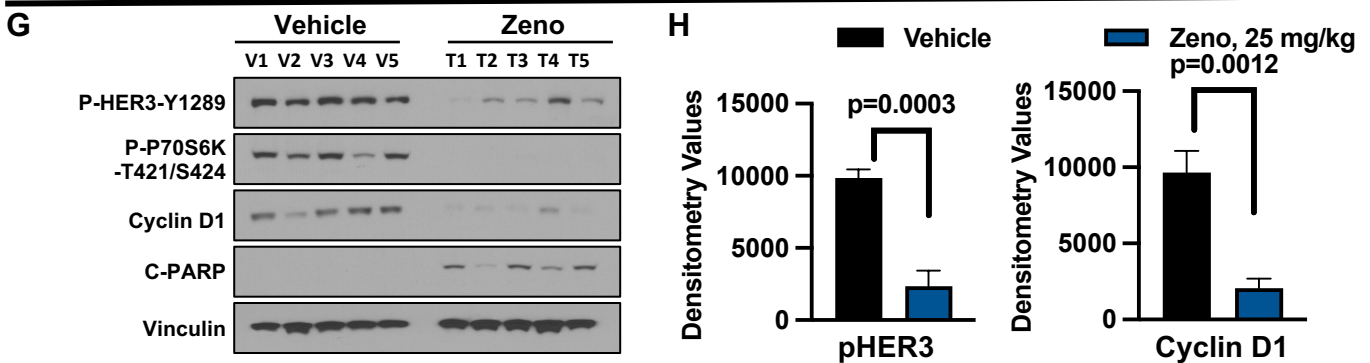

**Supplementary Figure S6. Efficacy of Zeno *in vivo*.** Mice bearing H6c7-SLC3A2-NRG1 xenograft tumors (**A-C**, 5 mice per group) or ST2891 PDX tumors (**D-F**, eight mice per group) were treated as indicated once weekly. Tumor size and animal weight were measured twice weekly. Tumor volume (**A** and **D**). Animals were weighed twice weekly (**C**). Zeno treatment did not adversely affect weight or animal health during the study. Vehicle-treated tumor in **A** reached the maximum allowable volume by day 10 and animals were sacrificed. Area under curve analysis (**B** and **E**). \* $P = 0.04$ . \*\* $P = 0.0014$ . **F**. Percent change in the volume of individual tumor at the end of the study (day 21). **G**. Mice bearing LUAD-0061AS3 PDX tumors (5 mice per group) were treated twice with vehicle or Zeno, 25 mg/kg, QW. Tumors were harvested 24 after the second dose and processed for western blotting analysis. **H**. Phospho-HER3 (**left**) and cyclin D1 (**right**) immunoblots were quantitated by densitometry. Data represents the mean signals  $\pm$  SEM of five vehicle- or five Zeno-treated tumors

## Supplementary Figure S7

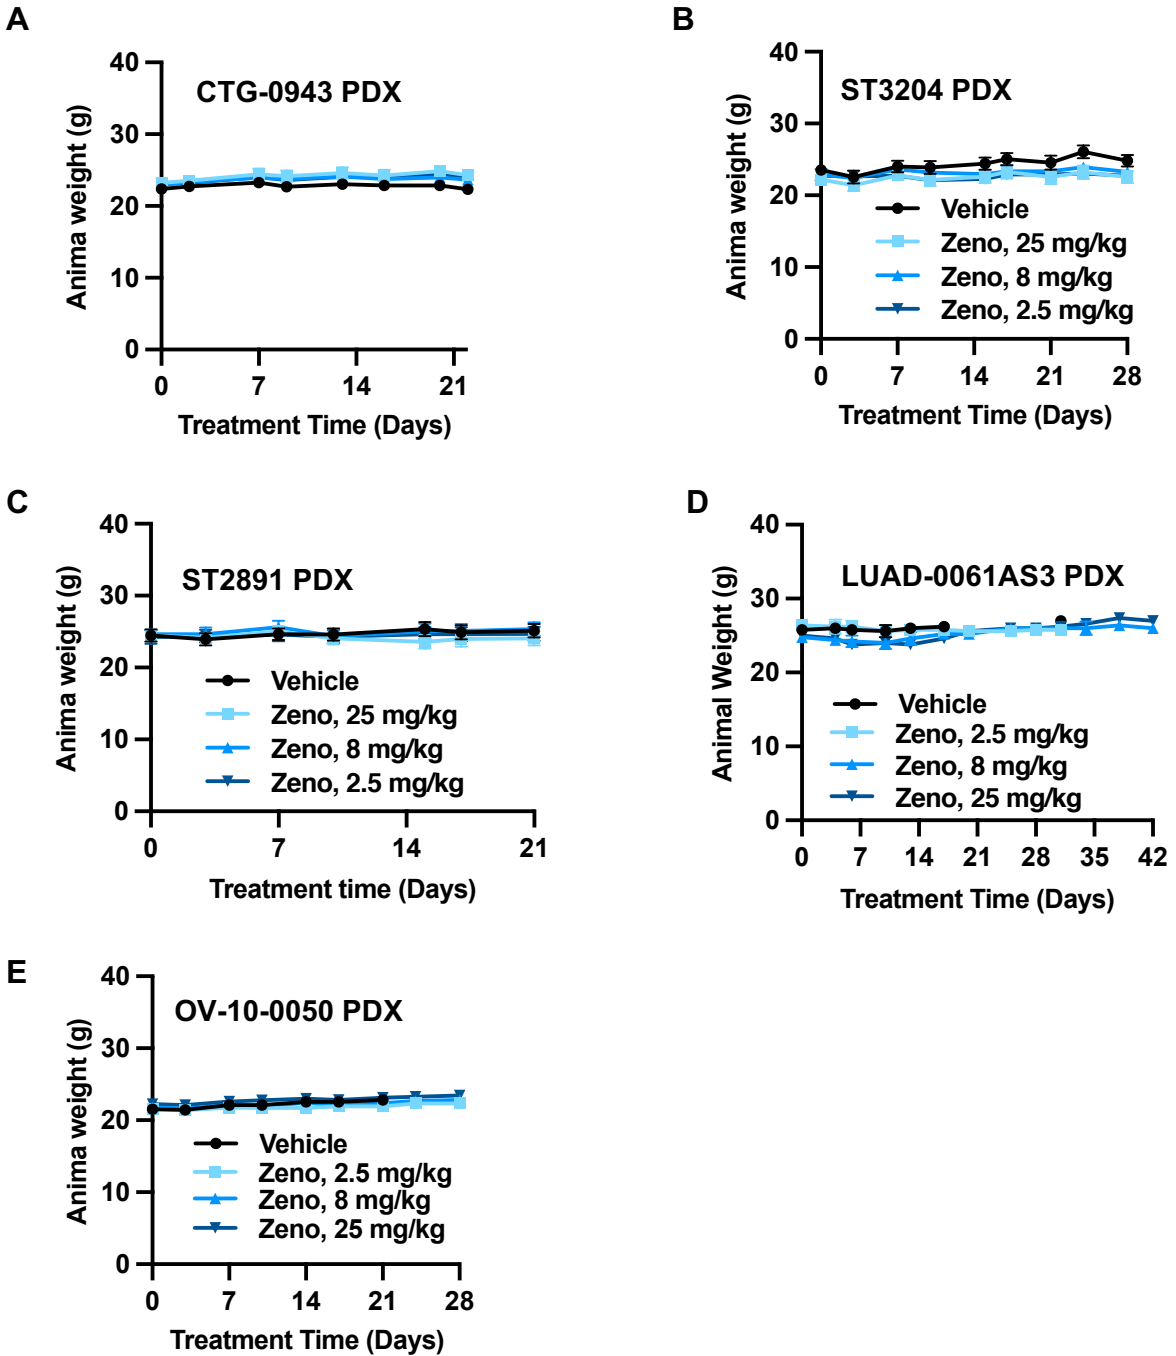

**Supplementary Figure S7. Weight of animals bearing PDX tumors.** Mice bearing PDX tumors derived from CTG-0943 (A), ST3204 (B), ST2891 (C), LUAD-0061AS3 (D) and OV-10-0050 (E) models were treated as indicated, with vehicle or Zeno, once weekly. Animals were weighed twice weekly. Zeno treatment did not adversely affect weight ( $p > 0.05$ ) or animal health during the study.
